# Supplementary material
Source: PubMed Central journal article supplement (PMC6079914)

Human fetuin: MS/MS spectra of all PTM modified peptides

## Glycosylation site

N156

VCQDCPLLAPLND  
VCQDCPLLAPLNDTRVVHAAK  
VCQDCPLLAPLNDTRVVHAAK

N176

AALAAFNAQNNGSNFQLEE

T256

VAVTCTVFQTQPVTSQPQPE

T270

GANEAVPTPVVDPDAPPSPLGAPGLPPAGSPPDSHVLLAAPPQHQLHRAHYD

S346

TVVQPSVGAAAGPVVPPCPGRIRHFK

## Phosphorylation site

S138

SSPDSAEDVRK

S330

LRHTFMGVVSLGSPSGE

K.VC[+57]QDC[+57]PLLAPLN[+2205]D.T z=3,scan#=10186,scan time=32.7878

Protease: Glu-C+Lys-C

109 8 7 6 5 4 3 2 1  
VCQDCPLLAPLND  
1 2 3 4 5 6 7 8 9 10

Intensity

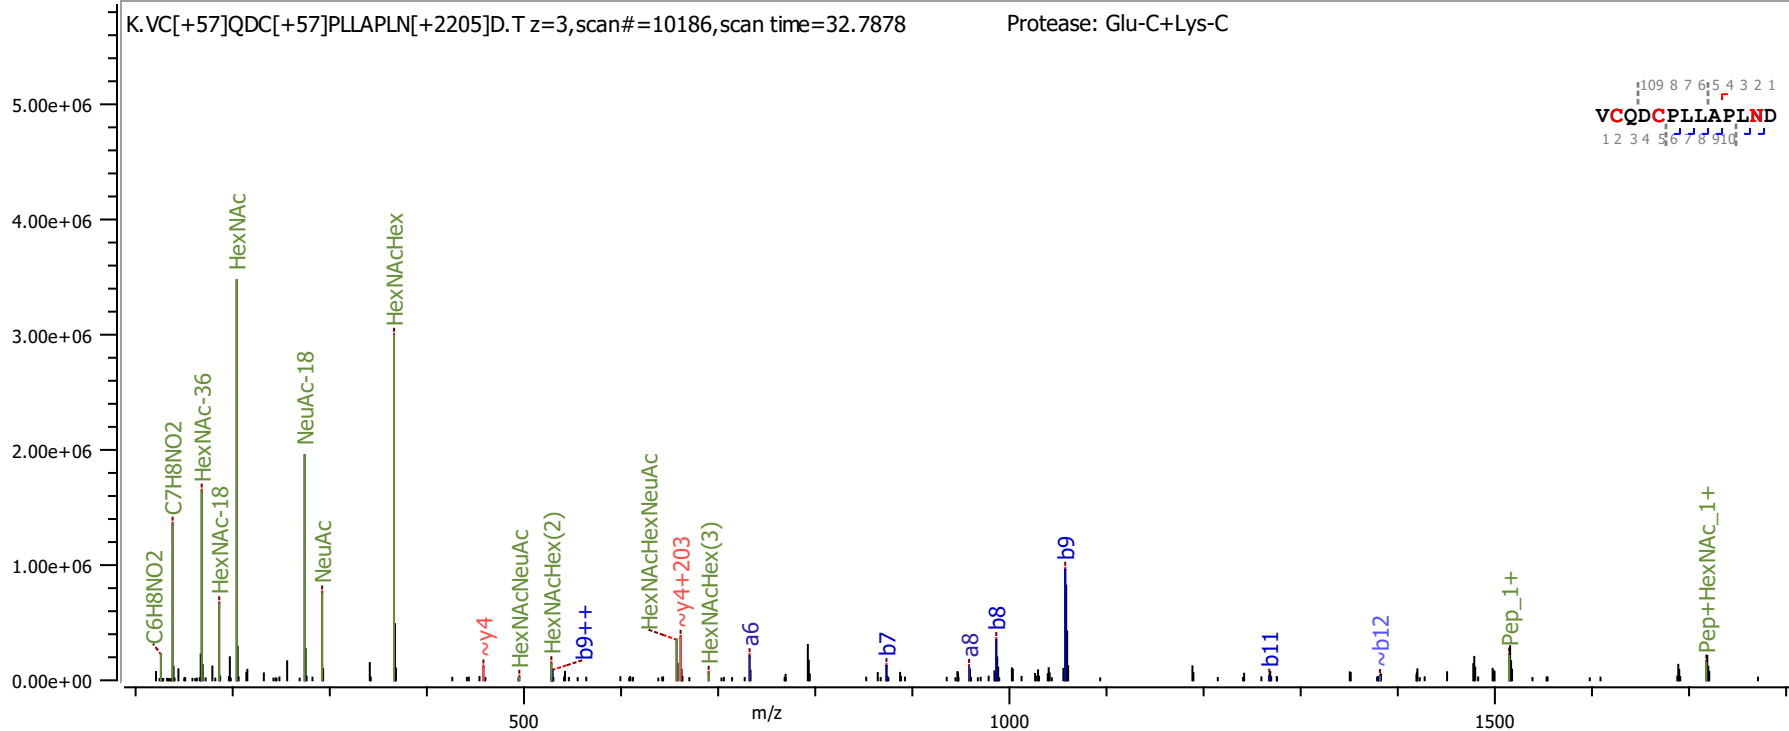

K.VC[+57]QDC[+57]PLLAPLN[+1914]D.T z=3,scan# =9485,scan time=31.3248

Protease: Glu-C+Lys-C

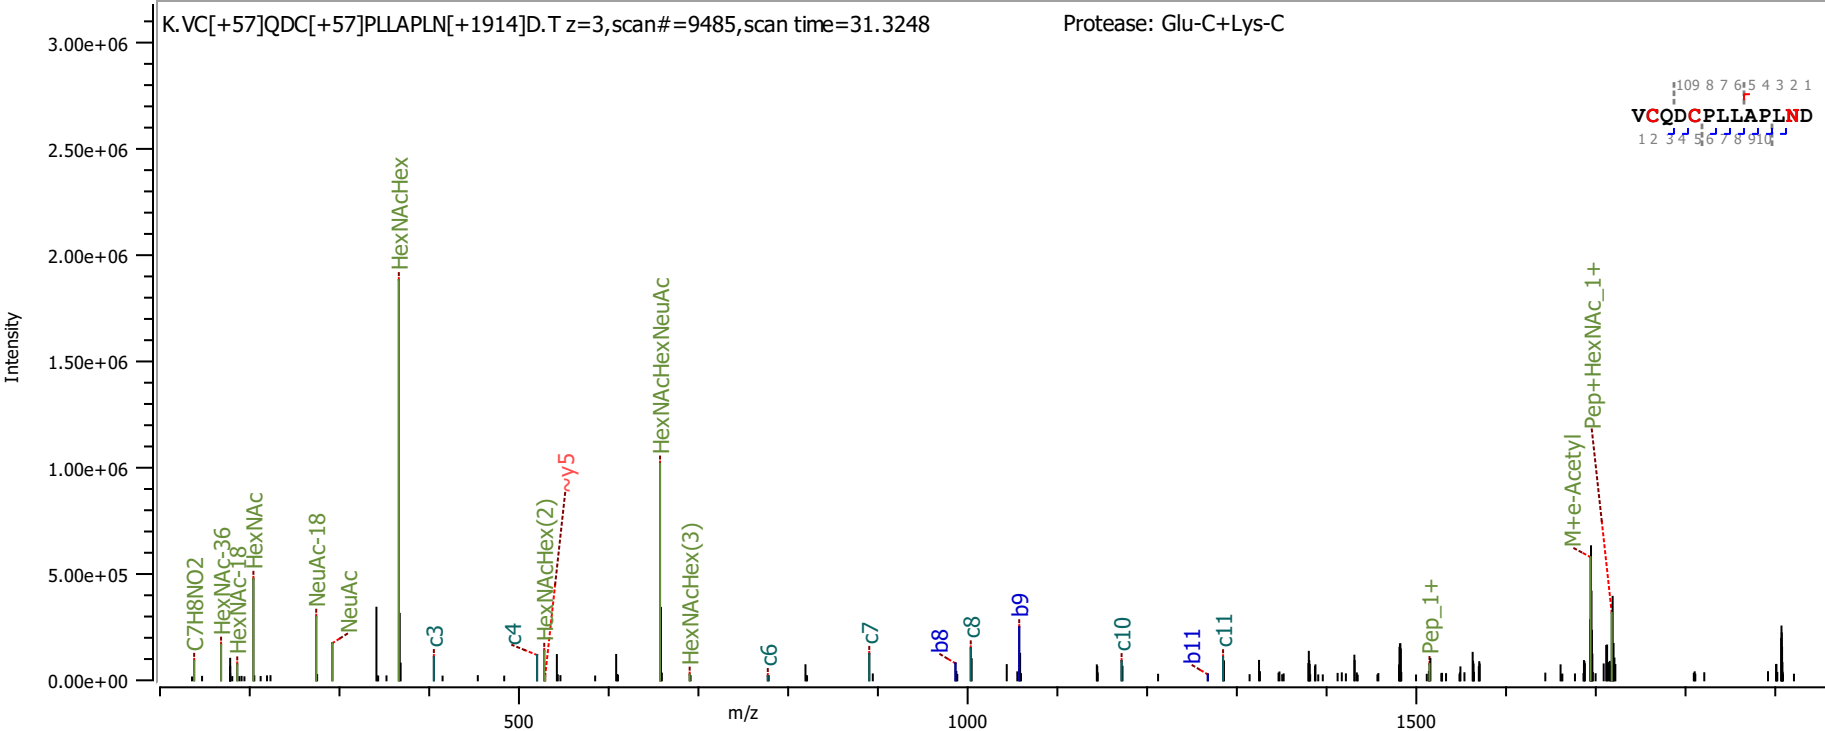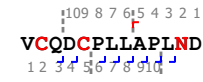

K.VC[+57]QDC[+57]PLLAPLN[+2351]DTRVHAAK.A z=4,scan#=8352,scan time=29.0167

Protease: Glu-C+Lys-C

20 15 109 8 7 6 5 4 3 2 1  
VCQDCPLLAPLNDRVHAAK  
1 2 3 4 5 6 7 8 9 10 11 12 13 14 15 16 17 18 19 20

Intensity

5.00e+06  
4.00e+06  
3.00e+06  
2.00e+06  
1.00e+06  
0.00e+00

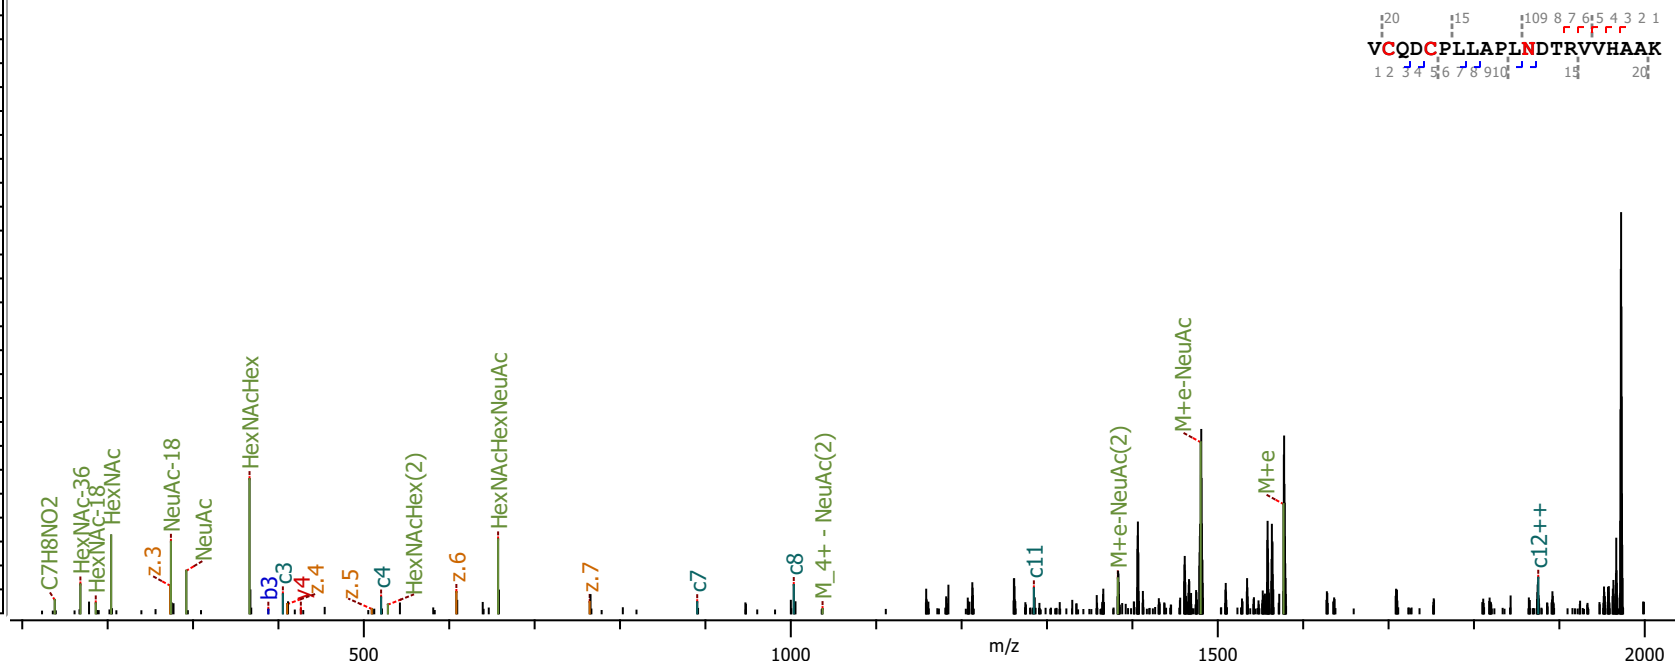

m/z

2000

K.VC[+57]QDC[+57]PLLAPLN[+2861]DTRVHAAK.A z=4,scan#=8943,scan time=30.2681

Protease: Glu-C+Lys-C

20 15 109 8 7 6 5 4 3 2 1  
VCQDCPLLAPLNDRVVHAAK  
1 2 3 4 5 6 7 8 9 10 11 12 13 14 15 16 17 18 19 20

Intensity

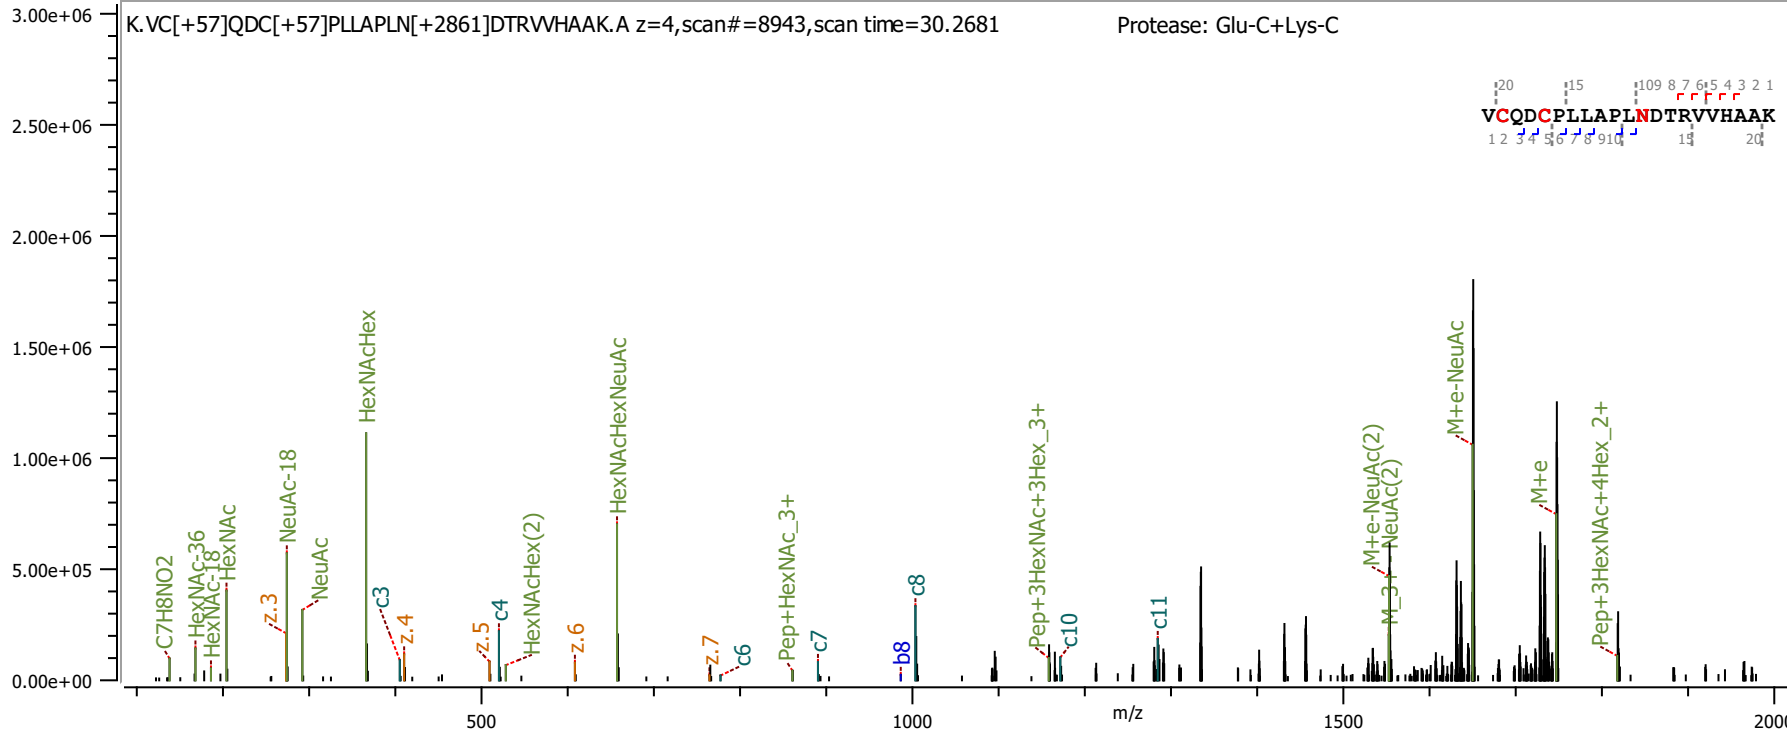

Intensity

1.20e+06  
1.00e+06  
8.00e+05  
6.00e+05  
4.00e+05  
2.00e+05  
0.00e+00

109 8 7 6 5 4 3 2 1  
VCQDCPLLAPLND  
12 3 4 5 6 7 8 9 10

0.00e+00

500

m/z

1000

1500

C7H8NO2

HexNAc-36

HexNAc-18

HexNAc

NeuAc-18

NeuAc

HexNAcHex

c3

HexHexNAcFuc

c4

HexNAcHex(2)

HexNAcHexNeuAc

c6

c7

b8

b9

M\_4+ - NeuAc

b11

Pep+HexNAc\_1+

K.AALAAFNAQNN[+2205]GSNFQLEE.I z=3,scan#=11937,scan time=36.8587

Protease: Glu-C+Lys-C

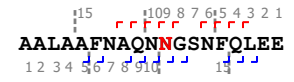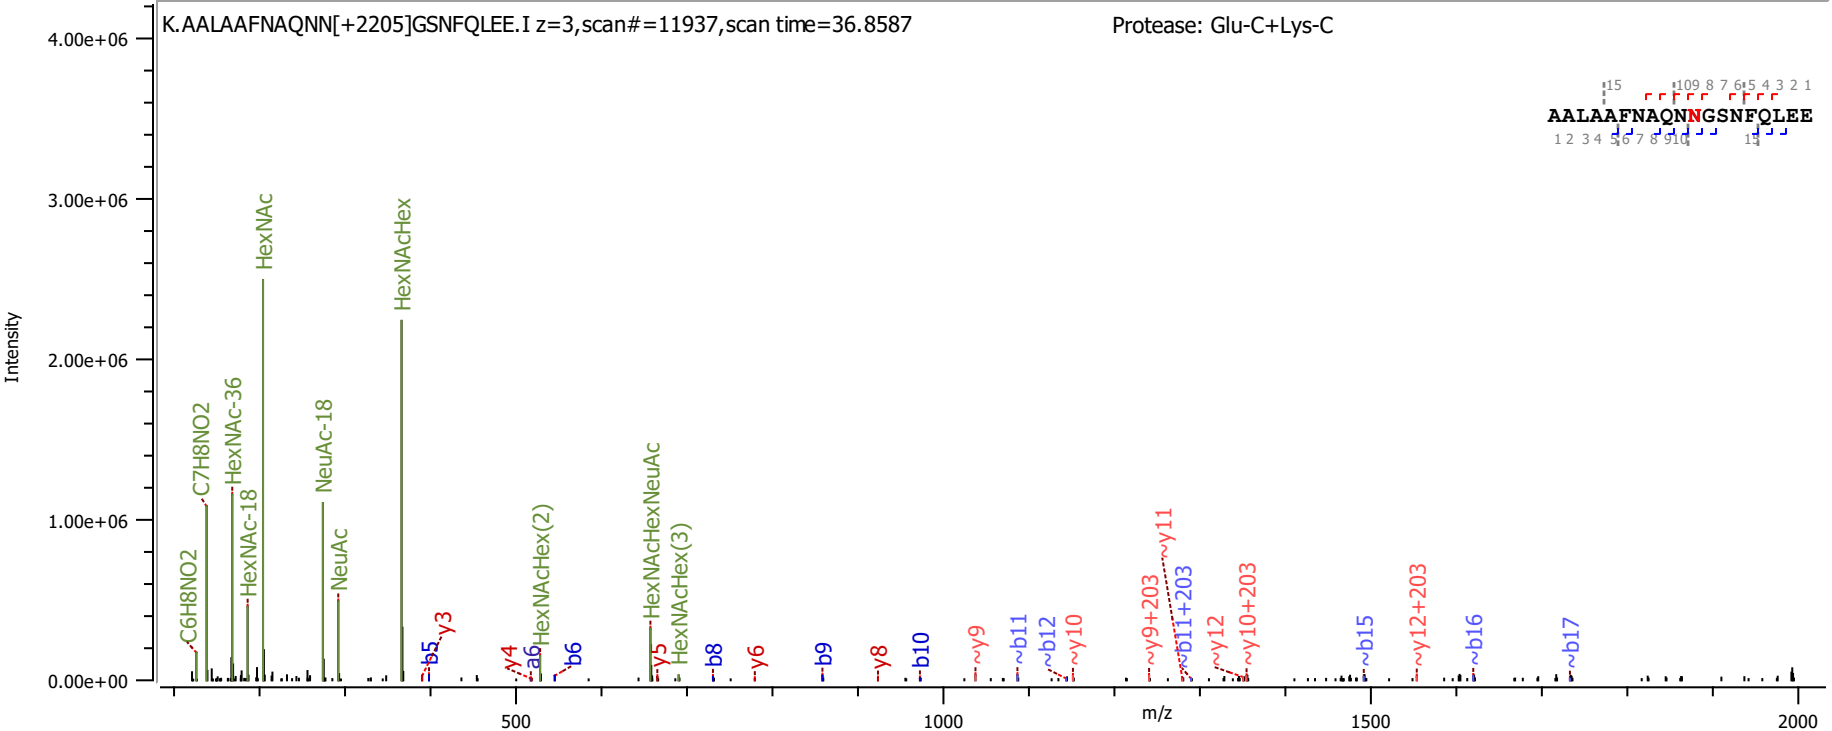



15 109 8 7 6 5 4 3 2 1  
A A L A A F N A Q N N G S N F Q L E E  
1 2 3 4 5 6 7 8 9 10 11 12 13 14

Intensity

2.50e+6  
2.00e+6  
1.50e+6  
1.00e+6  
5.00e+5  
0.00e+0

m/z

500

1000

1500

2000

C6H8NO2

C7H8NO2

c2

HexNAc-36

HexNAc-18

HexNAc

b3

c3

y2

NeuAc-18

NeuAc

b4

z.3-43

y3

c8++

y5

b5

y4

HexNAcHex(2)

b6

c6

z.5

b7

HexNAcHexNeuAc

y5

HexNAcHex(3)

b6

b8

c8

z.6

y6

a9

b9

y7

c9

y8

c10

Pep\_2+

Pep+HexNAc\_2+

Pep+2HexNAc\_2+

M+e-45

Pep+2HexNAc+2Hex\_2+

Pep+2HexNAc+3Hex\_2+

Pep+3HexNAc+3Hex\_2+

c16++

M+2e-NeuAc

M+2e-Acetyl

M+2e

M+2e-17

M+2e-45

M

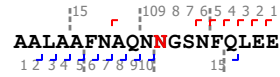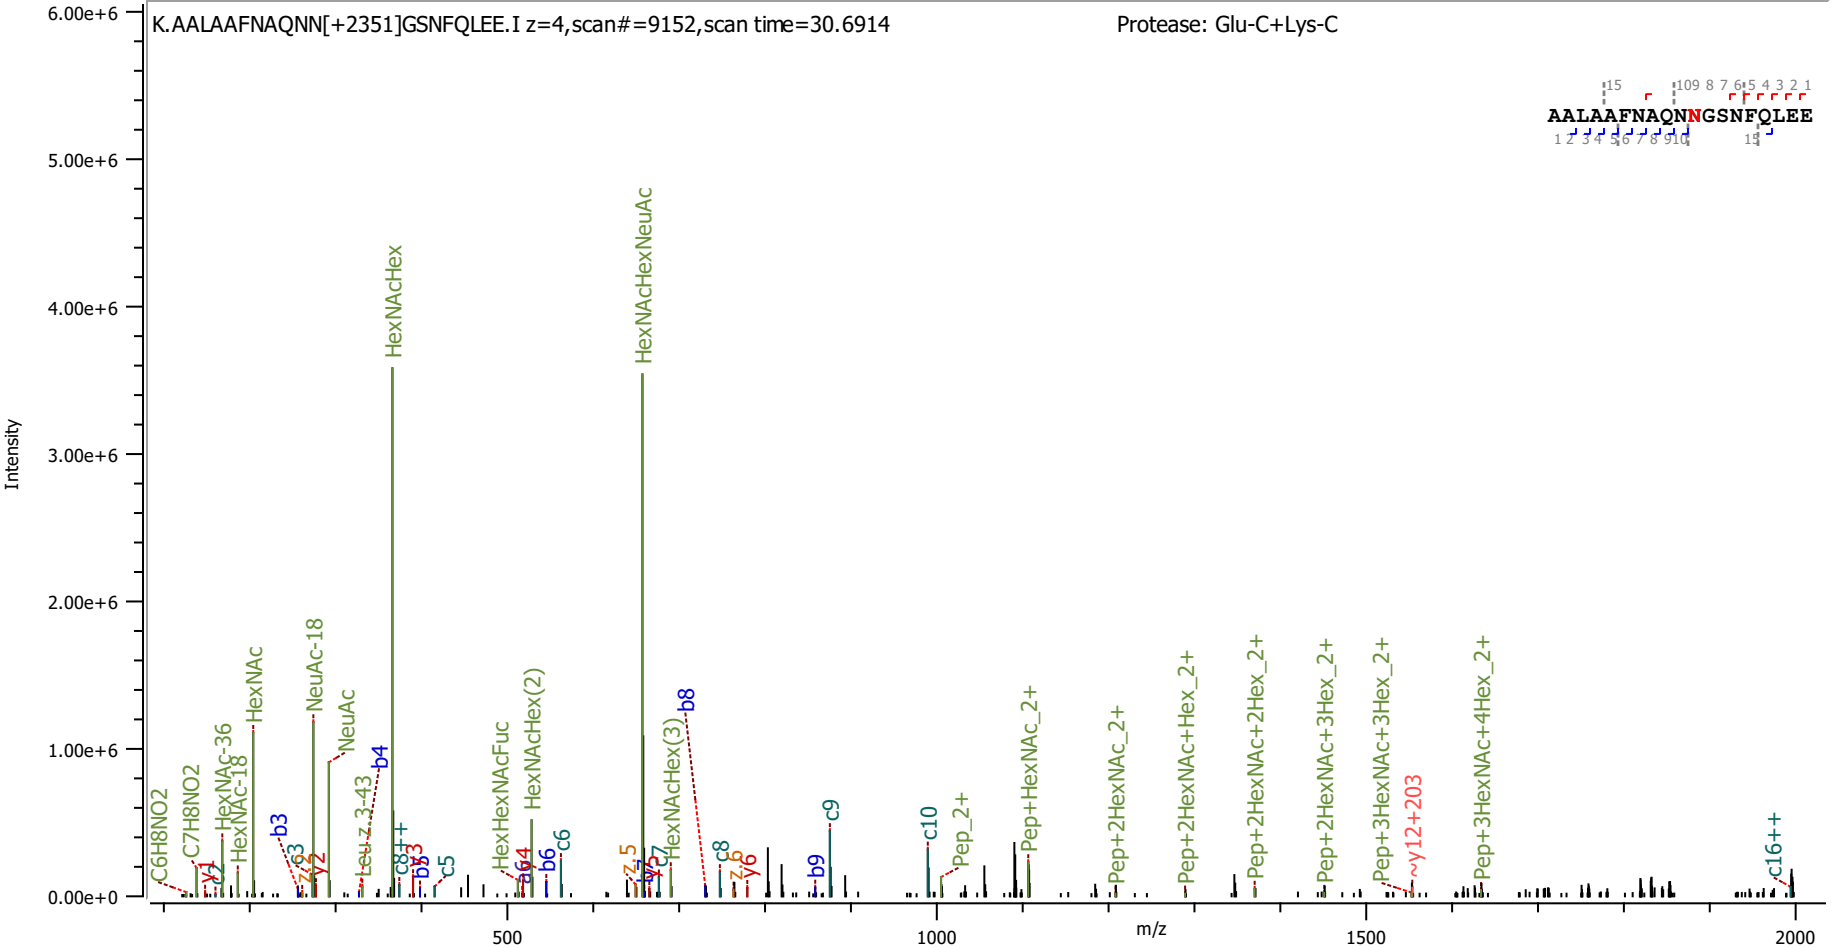

K.AALAAFNAQNN[+2861]GSNFQLEE.I z=4,scan#=9047,scan time=30.4867

Protease: Glu-C+Lys-C

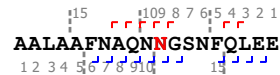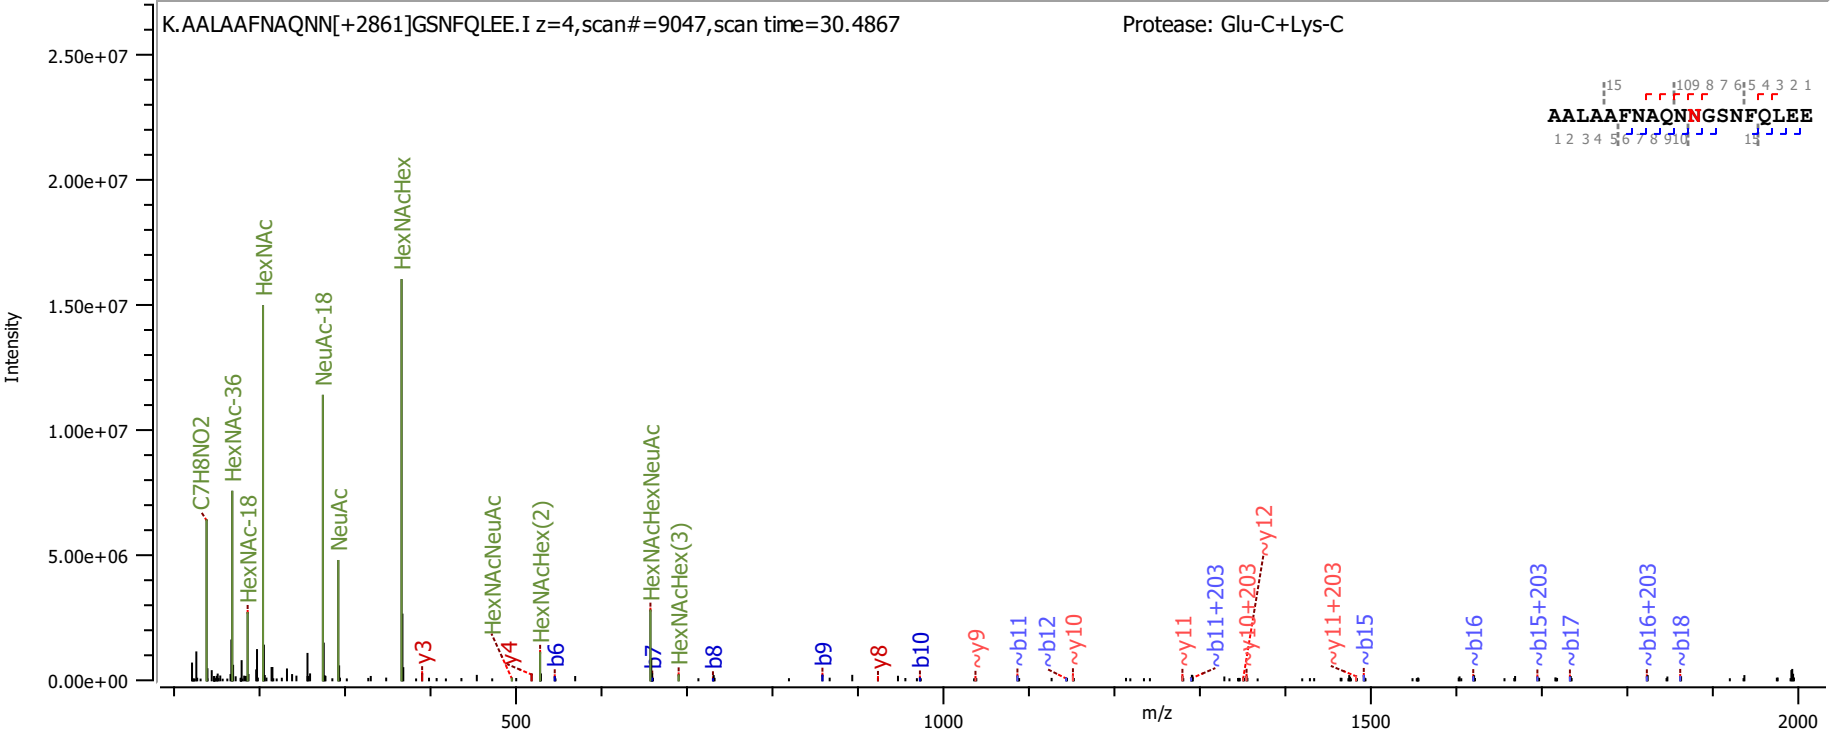

K.AALAAFNAQNN[+3007]GSNFQLEE.I z=4,scan#=9259,scan time=30.9020

Protease: Glu-C+Lys-C

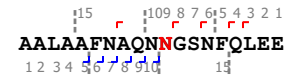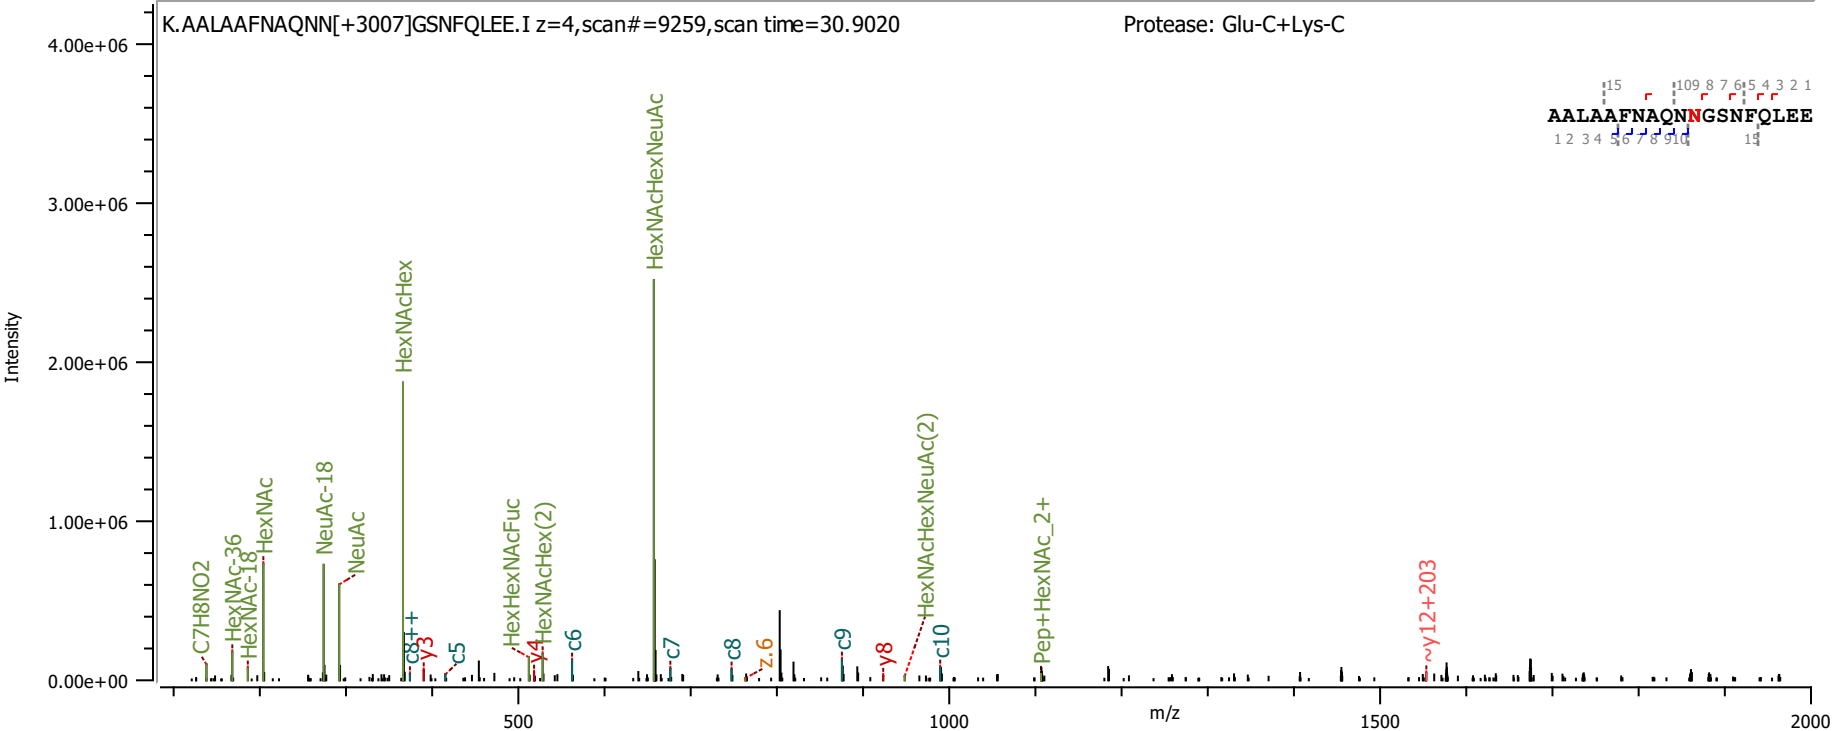

E. VAVTC[+57]TVFQTQPVT[+947]SQPQPE.G z=2, scan#=7833, scan time=28.0190

Protease: Glu-C+Lys-C

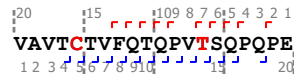

Intensity

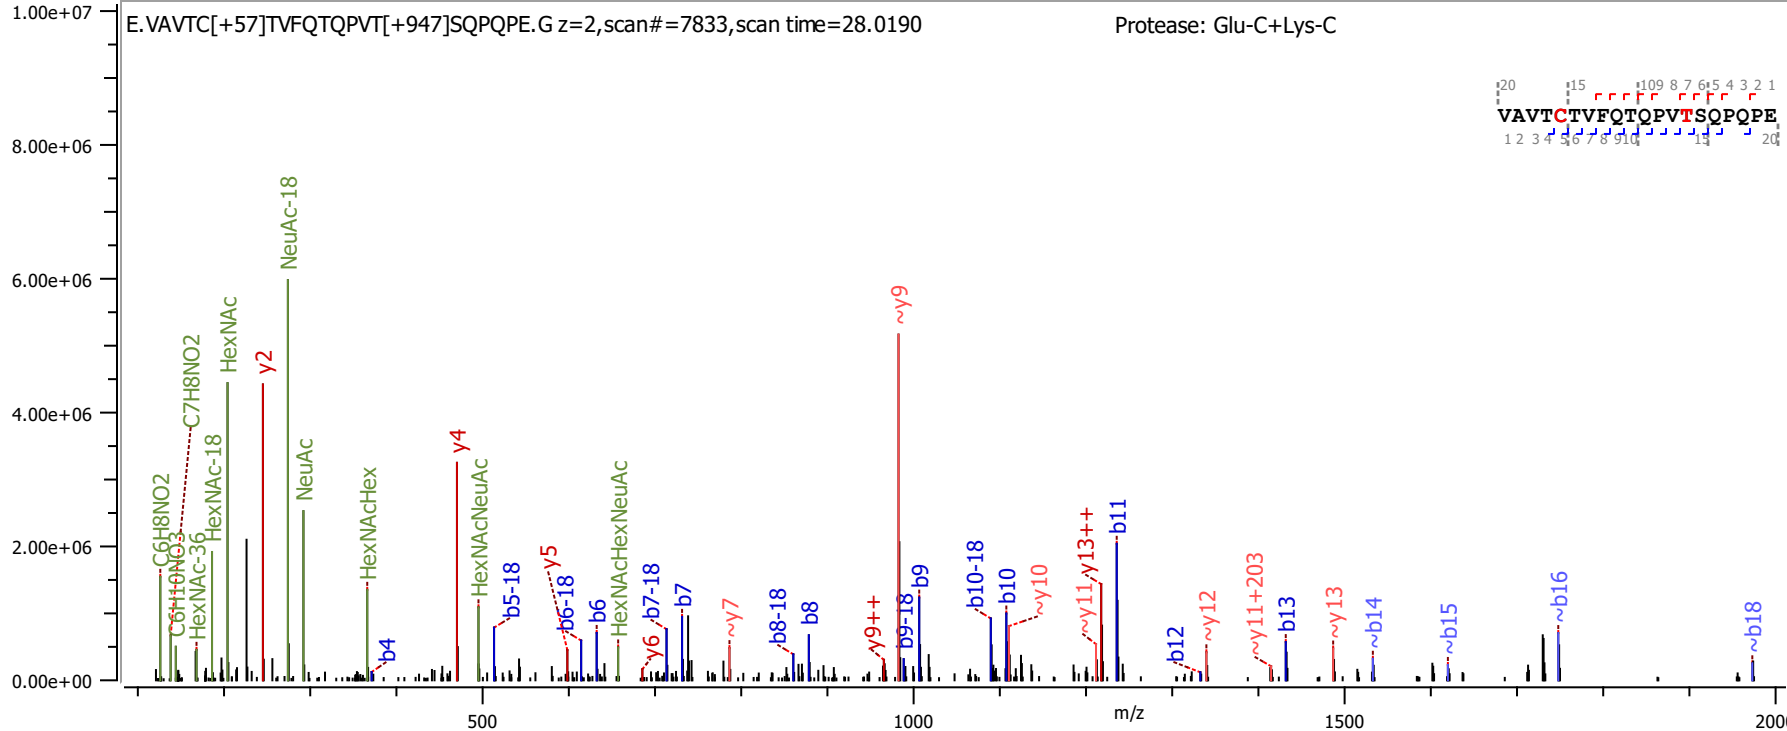

E. VAVTC[+57]TVFQTQPVTSPQPE.G z=2, scan#=8001, scan time=28.3262

Protease: Glu-C+Lys-C

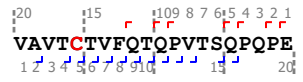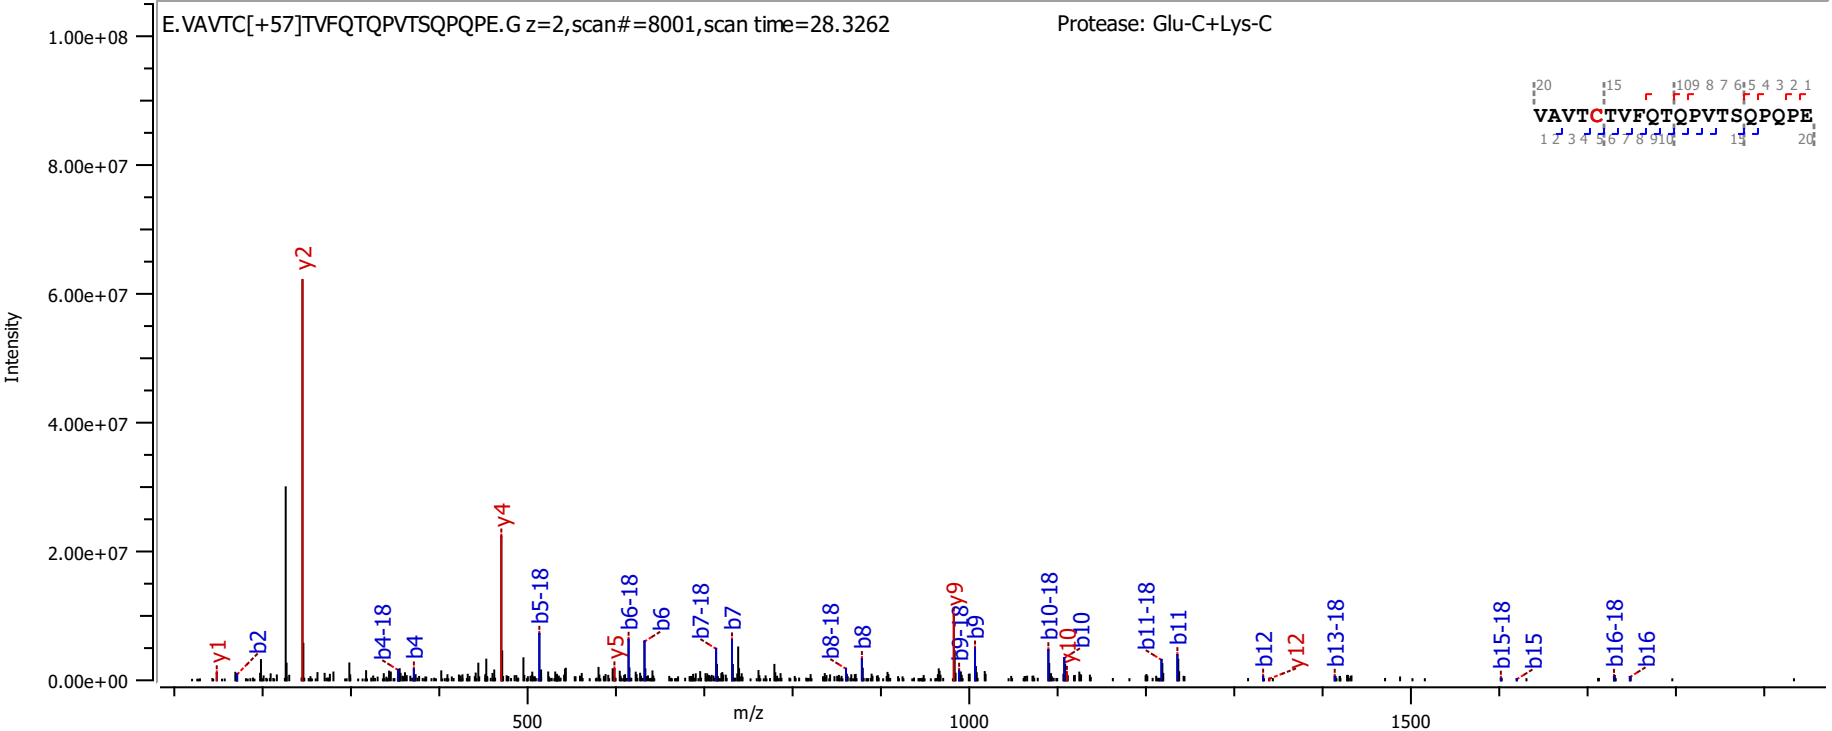

E. VAVTC[+57]TVFQTQPVT[+656]SQPQPE. G z=2, scan# = 7859, scan time = 28.0689

Protease: Glu-C+Lys-C

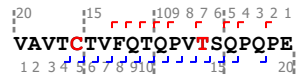

Intensity

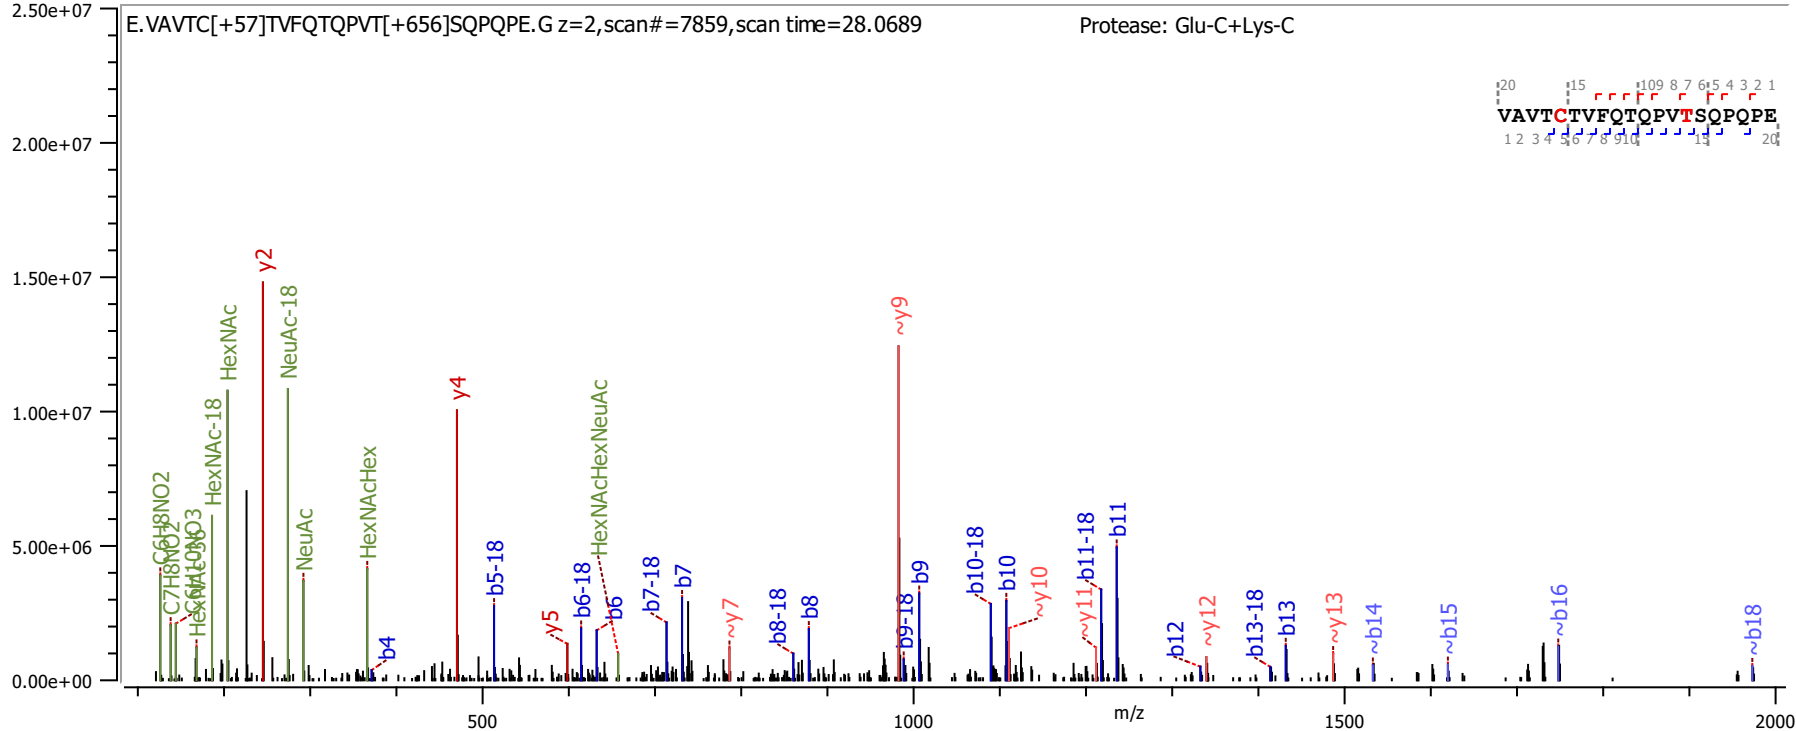

E. GANEAVPT[+656]PVVDPDAPPSPLGAPGLPPAGSPDASHVLLAAPPGLHRAHYD. L z=4, scan#=7874, scan time=28.0998

Protease: Glu-C+Lys-C

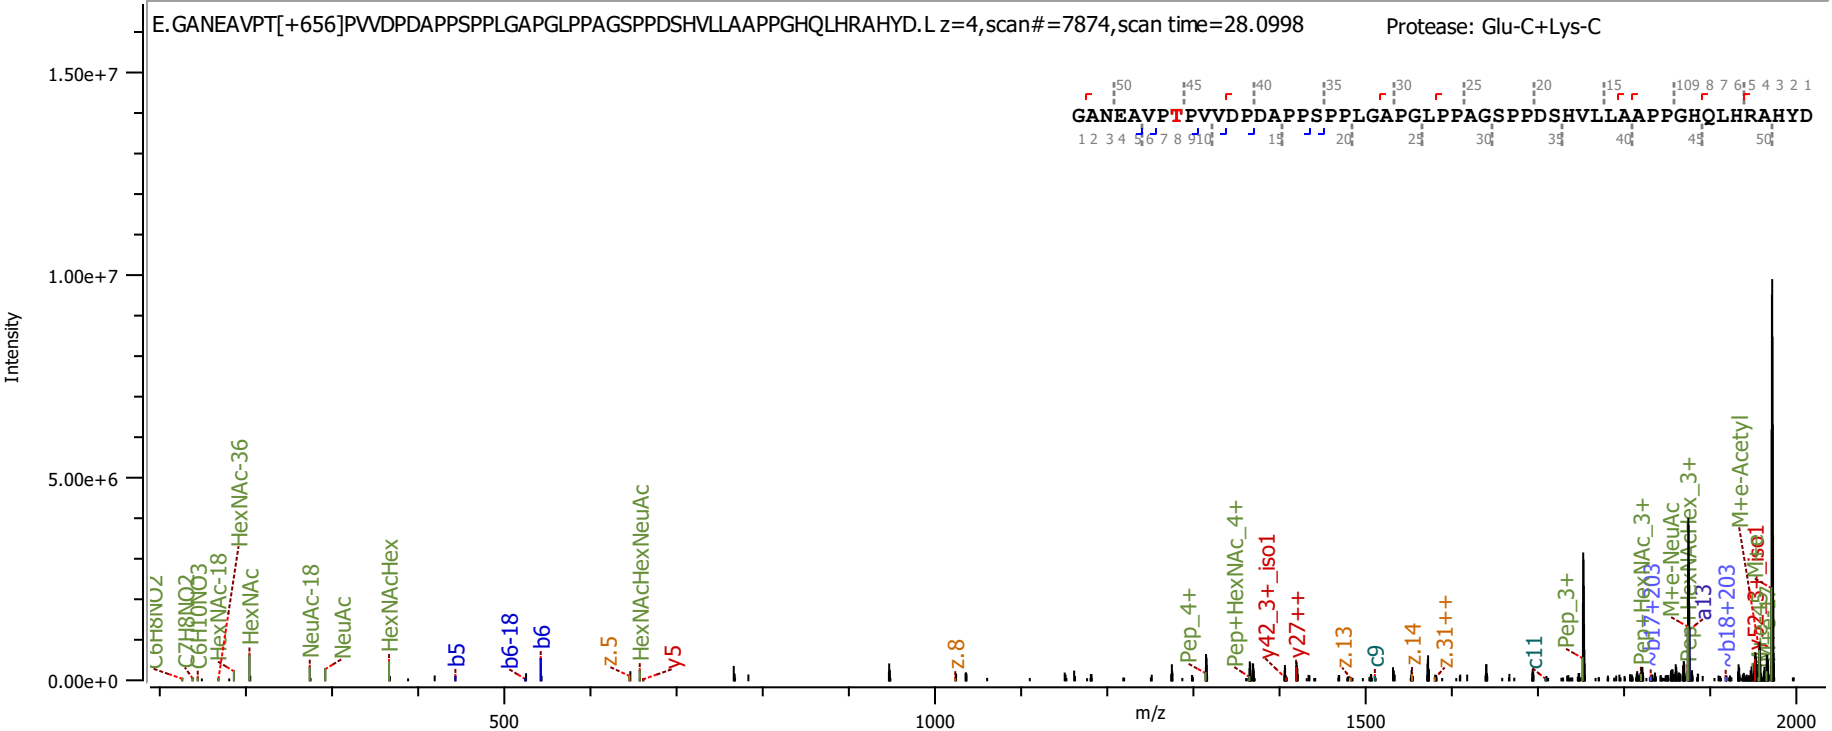



E. GANEAVPT[+947]PVVDPDAPPSPLGAPGLPPAGSPDShVLLAAPPGLHRAHYD. L z=5, scan#=7896, scan time=28.1402

Protease: Glu-C+Lys-C

Intensity

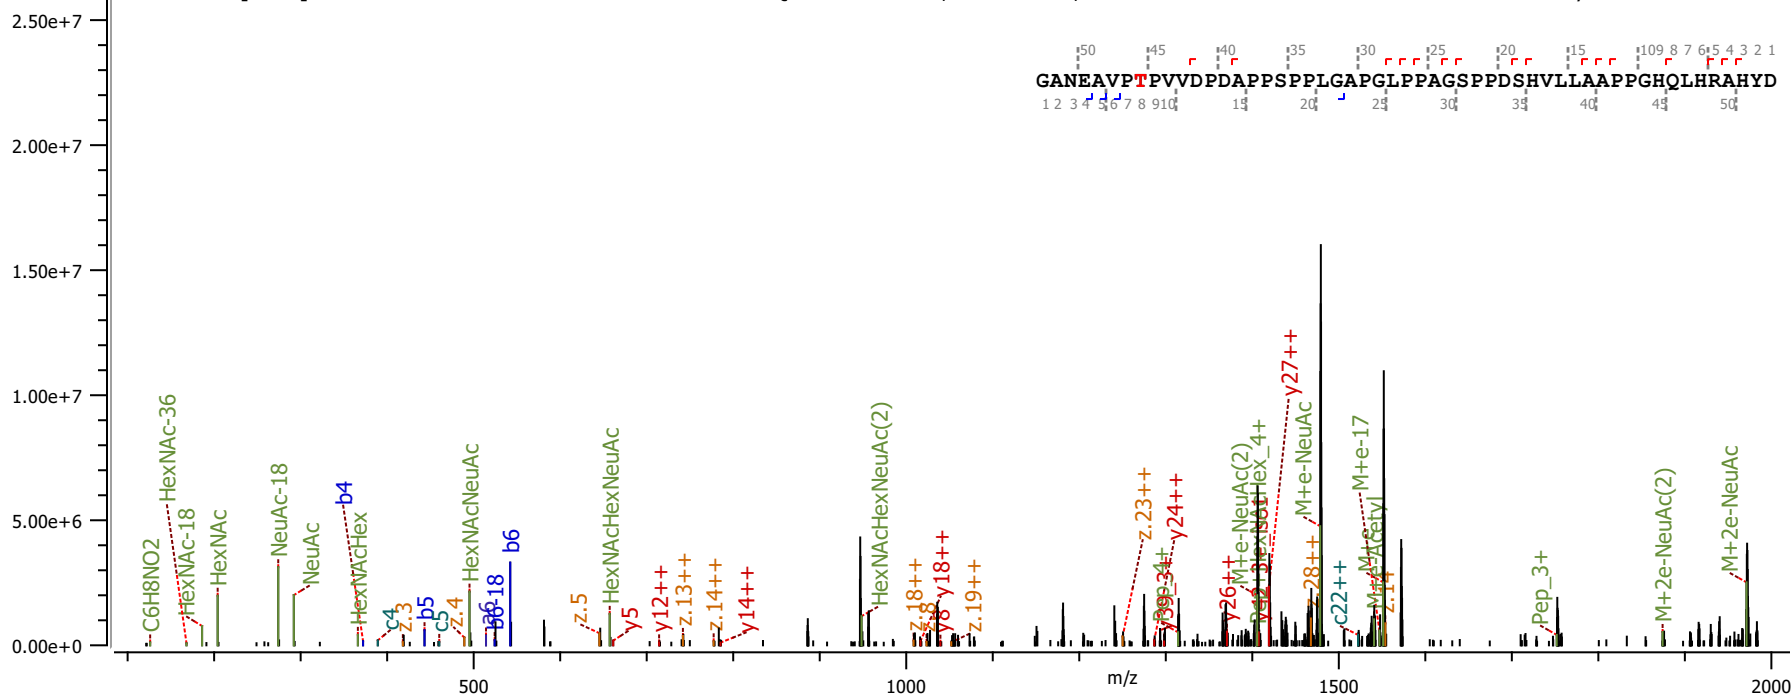

R. TVVQPSVGAAAGPVWPPC[+57]PGRIRHFK.V z=4, scan#=5322, scan time=23.4344

Protease: Glu-C+Lys-C

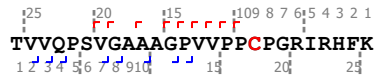

Intensity

3.50e+06  
3.00e+06  
2.50e+06  
2.00e+06  
1.50e+06  
1.00e+06  
5.00e+05  
0.00e+00

m/z

200

400

600

800

1000

1200

a2

b2

b3

b8++

b4

b10++

y11++

a7

y12++

y13++

y14++

y15++

y17++

y19++

b12

y20++

b13

y10

y11

R.TVVQPS[+656]VGAAAGPVWPPC[+57]PGRIRHFK.V z=5,scan#=5880,scan time=24.3679

Protease: Glu-C+Lys-C

25 20 15 109 8 7 6 5 4 3 2 1  
TVVQPSVGAAAGPVWPPCPGRIRHFK  
1 2 3 4 5 6 7 8 9 10 11 12 13 14 15 16 17 18 19 20 21 22 23 24 25

Intensity

7.00e+7  
6.00e+7  
5.00e+7  
4.00e+7  
3.00e+7  
2.00e+7  
1.00e+7  
0.00e+0

200 400 600 800 1000 1200  
m/z

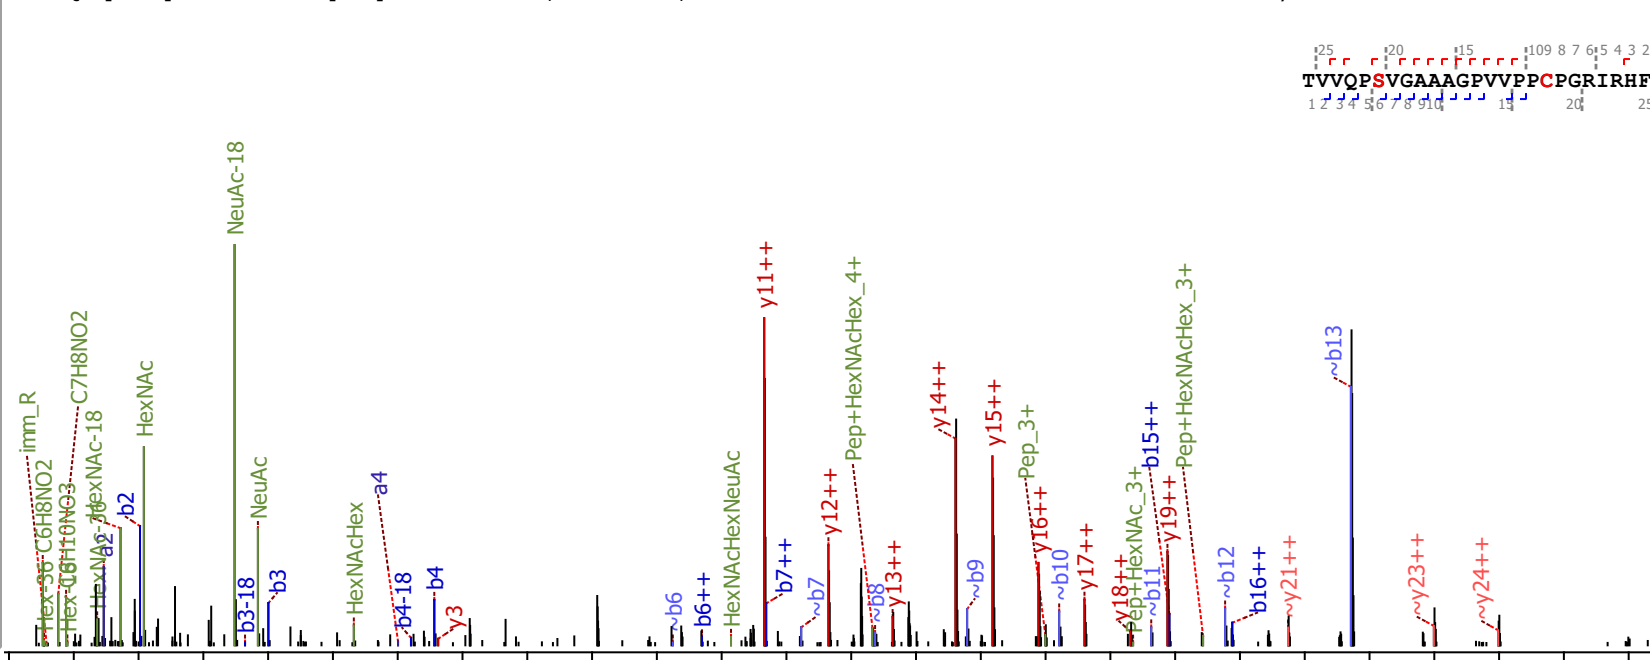

R.TVVGPS[+947]VGAAAGPVPPC[+57]PGRIRHFK.V z=5,scan#=5991,scan time=24.5560

Protease: Glu-C+Lys-C

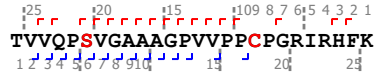

Intensity

1.00e+8  
8.00e+7  
6.00e+7  
4.00e+7  
2.00e+7  
0.00e+0

imm\_F  
Hex-36  
C6H8NO2  
C6H10NO3  
HexNAC-18  
HexNAC-36  
HexNAC  
b3-18  
y2  
b3  
HexNACHex  
b4-18  
b4  
y3  
HexNACNeuAc  
b5-18  
b5  
Pep\_5+  
y15\_3+  
b6  
y10++  
HexNACHexNeuAc  
b7  
y12++  
Pep+HexNACHex\_4+  
b8  
y13++  
b9  
y14++  
y15++  
Pep\_3+  
y16++  
y17++  
HexNACHexNeuAc(2)  
Pep+HexNAC\_3+  
y19++  
Pep+HexNACHex\_3+  
b12  
y20++  
y21++  
b13  
y23++  
b17++  
y24++  
b15  
Pep\_2+  
y11

m/z

Sequence: SSPDS[+79.9]AEDVRK z=3, scan=2830, scan time=18.0264

Protease: Glu-C+Lys-C

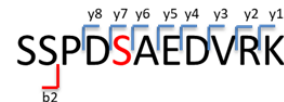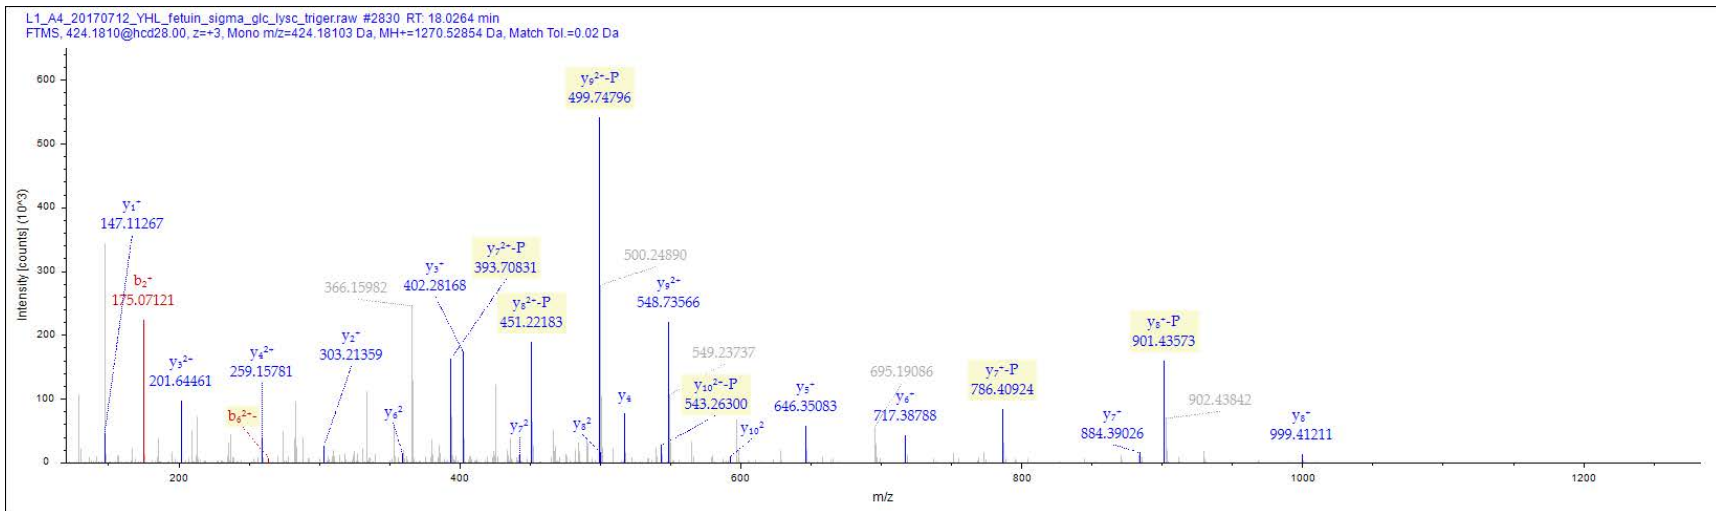

Sequence: LRHTFMGVVSLGSPS[79.9]GE z=3, scan=10547, scan time=33.5

Protease: Glu-C+Lys-C

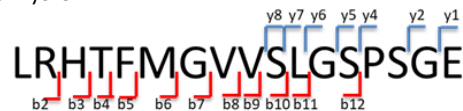

L1\_A4\_20170712\_YHL\_fetuin\_sigma\_glc\_lysc\_trigger.raw #10547 RT: 33.5043 min  
FTMS, 618.6243@hcd28.00, z=+3, Mono m/z=618.62433 Da, MH+=1853.85843 Da, Match Tol.=0.02 Da

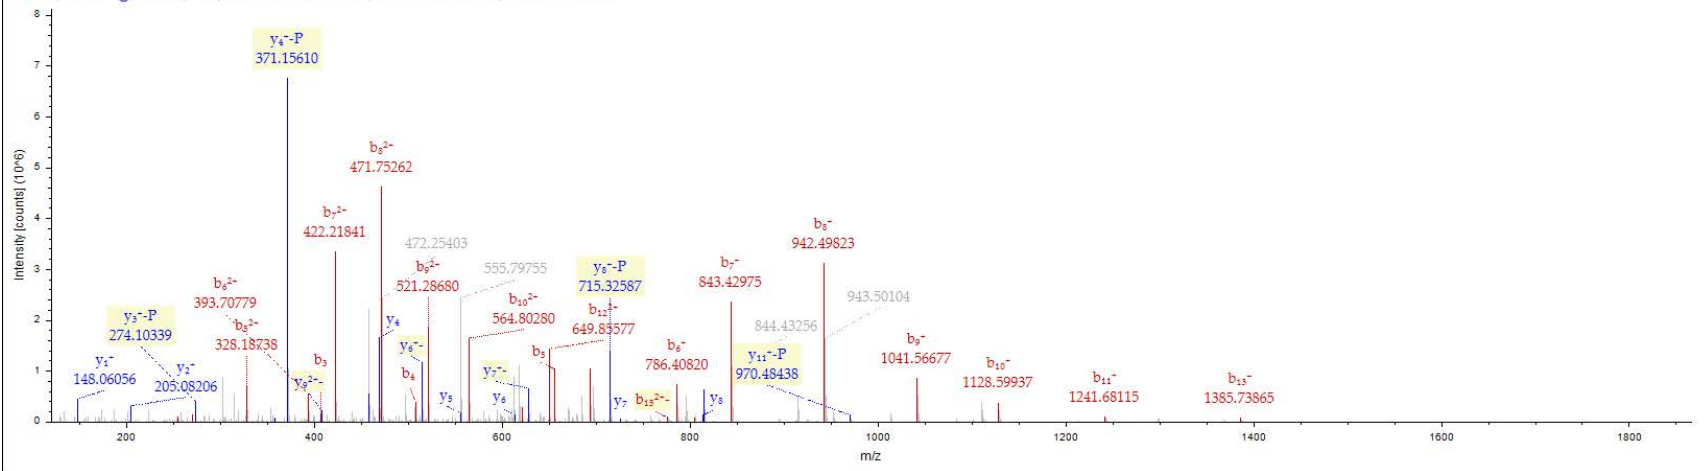

Supplement: pr8b00318_si_001.pdf [file pr8b00318_si_001.pdf]
